# Supplementary material for: Deep transfer learning for predicting frontier orbital energies of organic materials using small data and its application to porphyrin photocatalysts
Source: Royal Society of Chemistry journal article supplement (doi:10.1039/d3cp00917c), 2023-01-01
Supplement: d3cp00917c1.pdf [file d3cp00917c1.pdf]

# Supporting Information

## Deep transfer learning for predicting frontier orbital energies of organic materials using small data and its application to porphyrin photocatalysts

An Su<sup>\*</sup>, Xin Zhang, Chengwei Zhang, Debo Ding, Yun-Fang Yang, Keke Wang,  
Yuan-Bin She<sup>\*</sup>

College of Chemical Engineering, Zhejiang University of Technology,  
Hangzhou 310014, P. R. China

### **\* Corresponding authors**

Prof. An Su

Email: [ansu@zjut.edu.cn](mailto:ansu@zjut.edu.cn)

Prof. Yuan-Bin She

Email: [sheyb@zjut.edu.cn](mailto:sheyb@zjut.edu.cn)

College of Chemical Engineering, Zhejiang University of Technology, Hangzhou  
310014, P. R. China

1 **1. Supporting information for Metalloporphyrins and Porphyrins**  
2 **Database (MpPD)**

3 We constructed the MpPD containing 377 porphyrin structures by DFT calculation and  
4 literature review. The general porphyrin structure is shown in Figure S1. In the MpPD  
5 dataset, there are 69 A<sub>4</sub>-type porphyrin molecules that have been synthesized by our  
6 group<sup>1</sup> and 16 porphyrin structures that were retrieved from the literature<sup>2</sup>. We designed  
7 292 A<sub>2</sub>B<sub>2</sub>-type porphyrins by combining the side chain groups of these porphyrins with  
8 some common electron-absorbing and donating groups, a total of 11 substituent groups,  
9 and several metals such as Fe, Ni, Cu, Mn, and Co in different combinations structures.

10

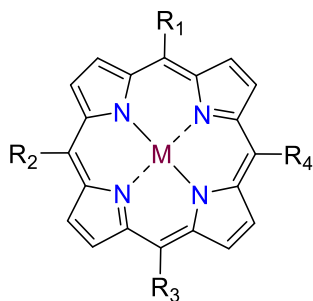

11

12 **Figure S1.** General porphyrin structure in MpPD

13

14 **A<sub>4</sub>-type Porphyrin Structure.** A<sub>4</sub>-type porphyrins have all four side-chain substituents  
15 identical. In other words, the R<sub>1</sub>, R<sub>2</sub>, R<sub>3</sub>, and R<sub>4</sub> groups are the same in Figure S1. 69  
16 A<sub>4</sub>-type porphyrin structures are designed or collected by combining 26 substituents with  
17 6 central metals, and the representative structure is shown in Figure S2. The structure of  
18 the substituents is visualized in Figure S3, and the central metal is shown in Figure S4.

19

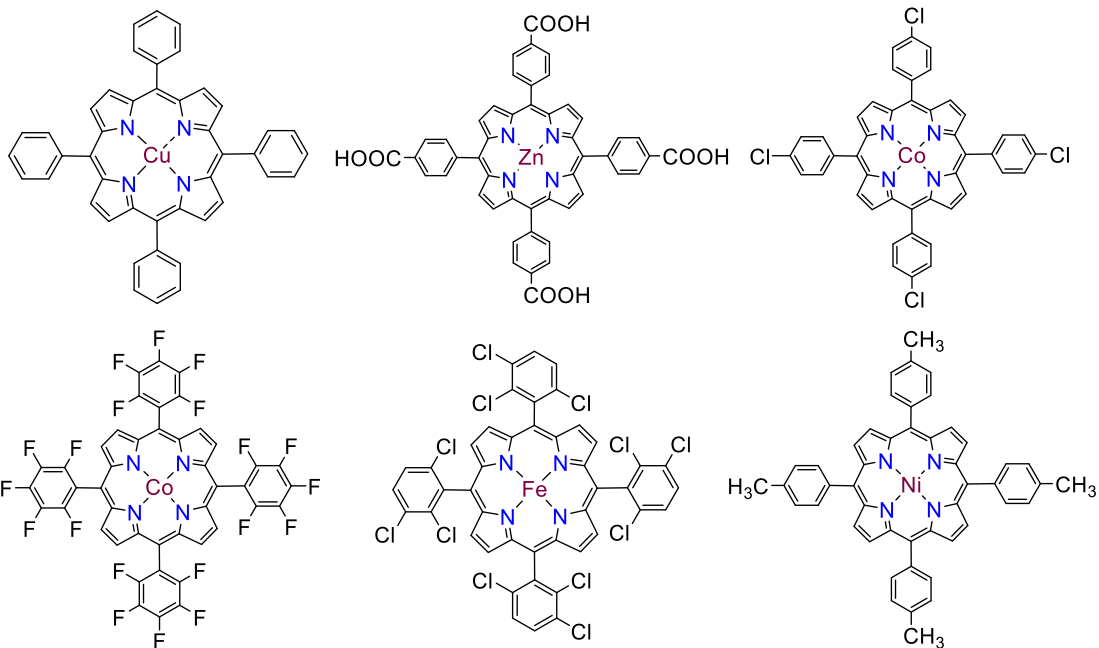

20

21

**Figure S2.** Representative structures of A<sub>4</sub>-type porphyrins in MpPD

22

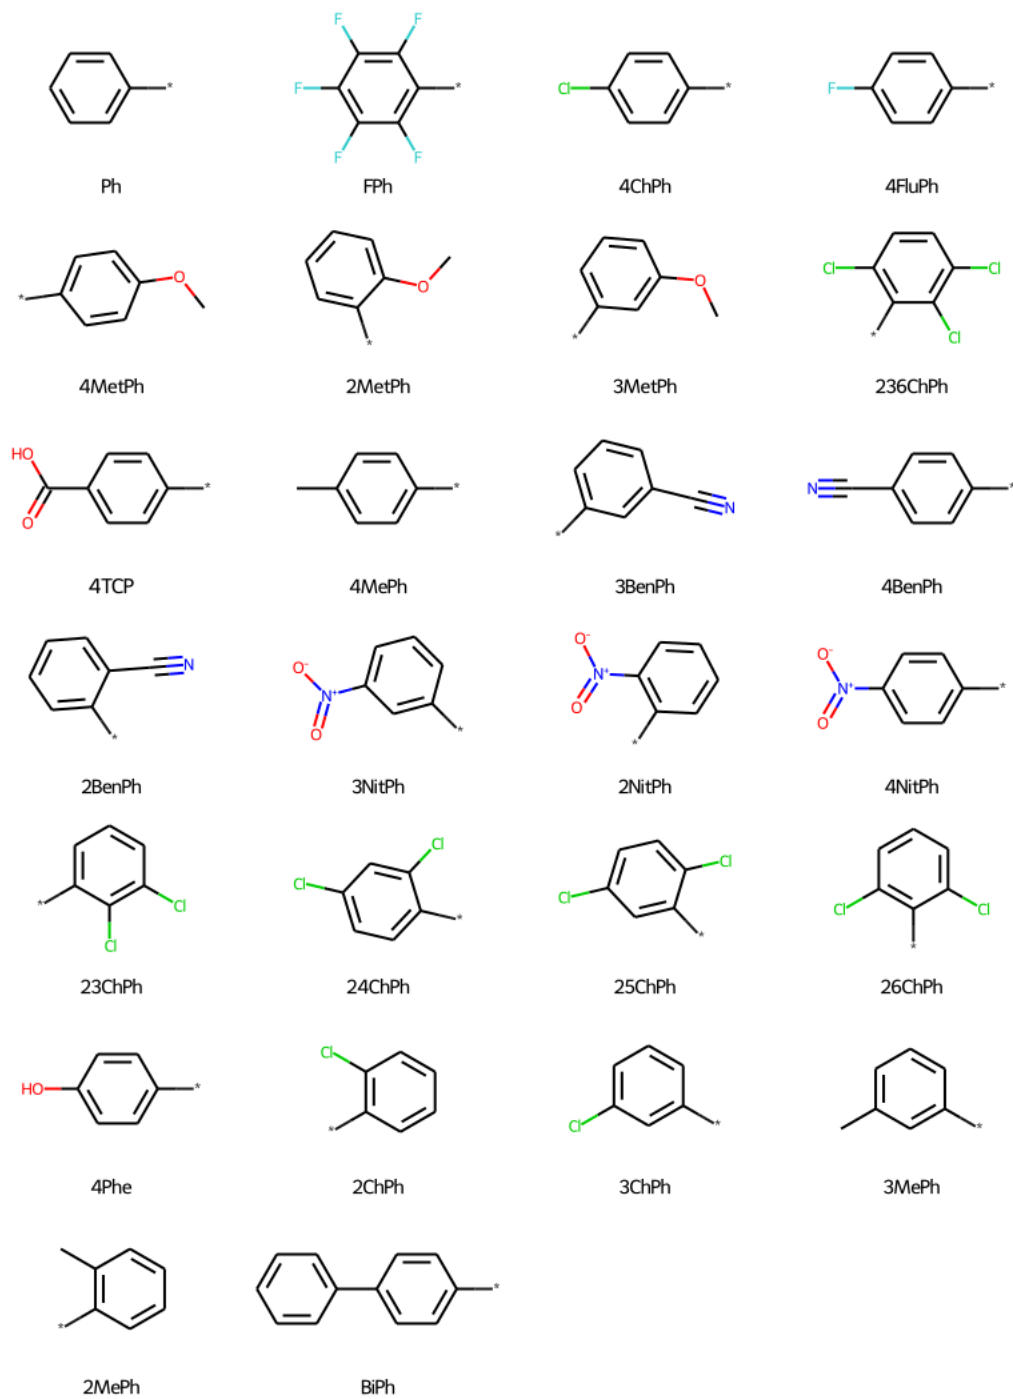

23

24

**Figure S3.** Structures of A<sub>4</sub>-type porphyrin side-chain substituents in MpPD

25

**Cu Zn Co Fe Mn Ni**

26

27

**Figure S4.** Central metals of A<sub>4</sub>-type porphyrins in MpPD

28 **A<sub>2</sub>B<sub>2</sub>-type Porphyrin Structure.** Using the 16 porphyrin side chain groups retrieved  
29 from the literature, a total of 11 substituents in combination with some common  
30 electron-absorbing and donating groups and central metals including Fe, Ni, Cu, Mn, and  
31 Co, 292 porphyrin structures of A<sub>2</sub>B<sub>2</sub> type were designed. The A<sub>2</sub>B<sub>2</sub> type porphyrin  
32 structures have R1 and R3 side-chain substituents the same and R2 and R4 the same (  
33 Figure S1). A representative A<sub>2</sub>B<sub>2</sub>-type porphyrin structure is shown in Figure S5, and  
34 the substituent structure is shown in Figure S6. The central metal is shown in Figure S7.

35

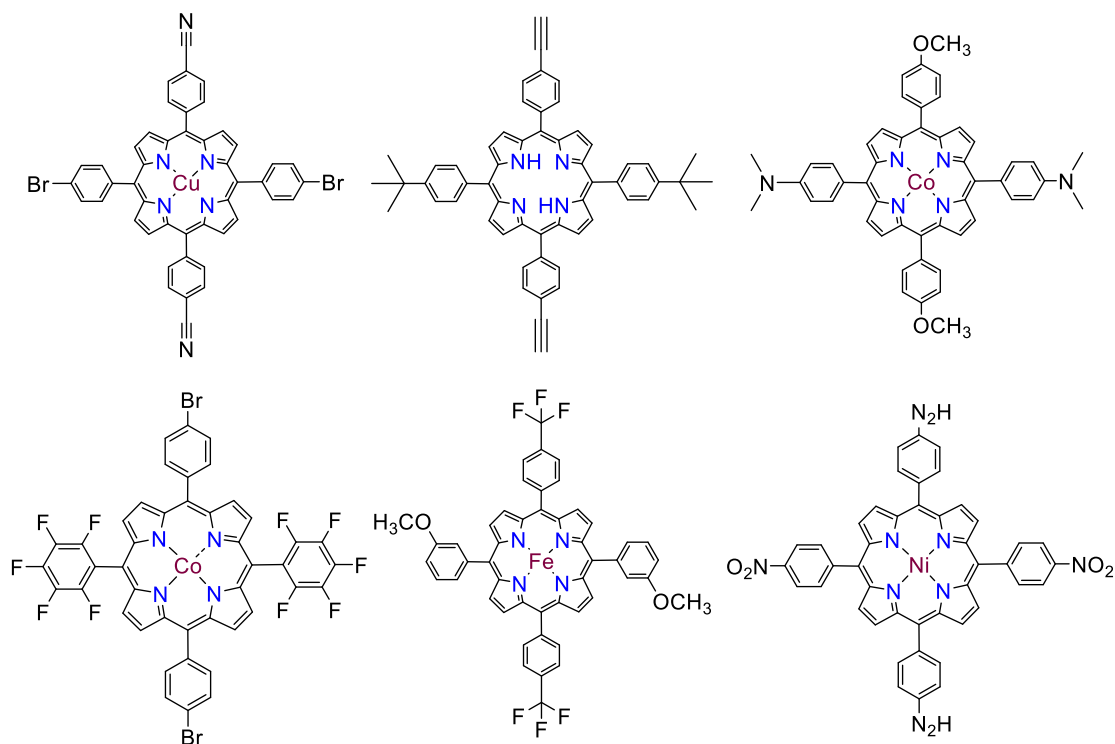

36

37

**Figure S5.** Representative structures of A<sub>2</sub>B<sub>2</sub>-type porphyrins in MpPD

38

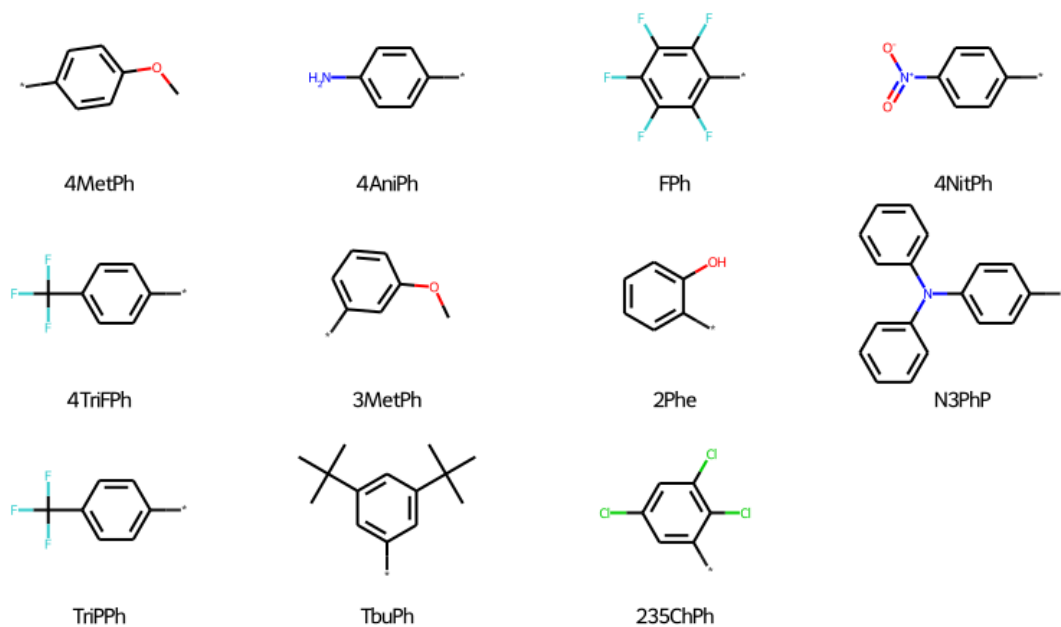

39

40

**Figure S6.** Side-chain substituents of  $A_2B_2$ -type porphyrins in MpPD

41

42

43

44

**Cu      Co      Fe      Mn      Ni**

45

46

**Figure S7.** Central metals of  $A_2B_2$  porphyrins in MpPD

47

48

49

50

51 **Porphyrin Structures from literature.** The 16 porphyrin structures retrieved from the

52 literature are shown in Figure S8.<sup>2</sup>

53

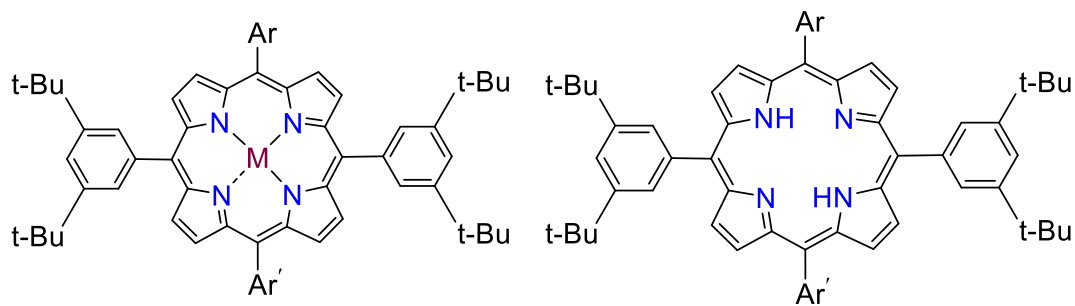

**PP:**

|                |                 |
|----------------|-----------------|
| <b>DD</b>      | (Ar=Ar'=D1)     |
| <b>AA1-AA5</b> | (Ar=Ar'=A1-A5)  |
| <b>DA1</b>     | (Ar=D1, Ar'=A1) |

**PP-M**  
(M=Ni, Co, Zn)

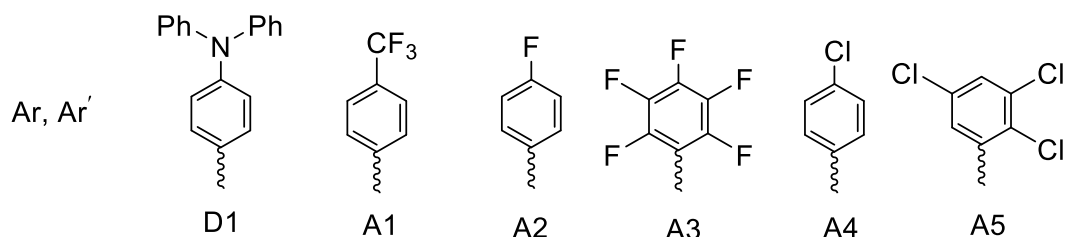

54

55

**Figure S8.** Structures of porphyrins retrieved from literature<sup>2</sup>

56

57

58

59

60

61 **Statistical summary of DFT calculations of MpPD.** A statistical summary of the results  
62 of the DFT calculations is provided in Table S2, which includes the mean and standard  
63 deviation (std) of HOMO, LUMO and E\_gap, as well as the quartiles, maximum, and  
64 minimum values.

65 **Table S2.** MpPD data set statistics

|       | <b>HOMO (eV)</b> | <b>LUMO (eV)</b> | <b>E_gap (eV)</b> |
|-------|------------------|------------------|-------------------|
| count | 377              | 377              | 377               |
| mean  | -5.5049          | -2.8510          | 2.6544            |
| std   | 0.3630           | 0.3602           | 0.2379            |
| min   | -6.2695          | -3.7337          | 1.7799            |
| 25%   | -5.7315          | -3.1372          | 2.5176            |
| 50%   | -5.4817          | -2.8450          | 2.7176            |
| 75%   | -5.2500          | -2.5731          | 2.8345            |
| max   | -4.6831          | -2.0248          | 2.9982            |

66

67

68

69

70

71

72

73



## 74 2. Supporting Information for Porphyrin-based Dyes Database (PBDD)

75 For the model pre-training data, we used the Porphyrin-based Dyes Database (PBDD)  
76 from the Computational Materials Repository (CMR)<sup>3</sup>. Currently, 12,096 porphyrin  
77 molecular structures and information such as HOMO, LUMO, and energy gap  
78 information are stored (Table S1).

79 **Table S1.** Molecular information in PBDD

| key    | description                                       | unit |
|--------|---------------------------------------------------|------|
| A      | Anchor group                                      |      |
| E_HOMO | HOMO location calculated as ionization potential  | eV   |
| E_LUMO | LUMO location calculated as electron affinity     | eV   |
| E_gap  | Electronic gap calculated as E_LUMO – E_HOMO      | eV   |
| ID     | The unique number of the molecule in the database |      |
| M      | Metal center                                      |      |
| Mass   | Relative molecular weight                         |      |
| R1     | First side group                                  |      |
| R2     | Second side group                                 |      |
| R3     | Third side group                                  |      |

80

81

82

83

84

85

86

87

88 **3. Hyperparameters optimization of PorphyBERT and PorphyDMPNN**  
 89 **and learning curves of optimized models**

90 We tuned the hyperparameters of the PorphyBERT and PorphyDMPNN models, mainly  
 91 on the epoch and dropout. The optimization results are listed in Table S3 and Table S4.  
 92 With the optimized hyperparameters, learning curves were plotted in Table S5 and Table  
 93 S6.

94  
 95 **Table S3.** Parameters tuning of PorphyBERT and the performance on training, validation and test  
 96 sets

| Epoch | Dropout | Train        |             | Validation   |             | Test         |             |
|-------|---------|--------------|-------------|--------------|-------------|--------------|-------------|
|       |         | RMSE<br>(eV) | MAE<br>(eV) | RMSE<br>(eV) | MAE<br>(eV) | RMSE<br>(eV) | MAE<br>(eV) |
| E_gap |         |              |             |              |             |              |             |
| 30    | 0.4     | 0.0598       | 0.0466      | 0.1043       | 0.0646      | 0.0933       | 0.0589      |
| 38    | 0.4     | 0.0426       | 0.0269      | 0.0901       | 0.0412      | 0.0378       | 0.0261      |
| 50    | 0.4     | 0.0904       | 0.0700      | 0.1177       | 0.0884      | 0.1005       | 0.0853      |
| HOMO  |         |              |             |              |             |              |             |
| 30    | 0.4     | 0.0498       | 0.0288      | 0.0871       | 0.0458      | 0.0431       | 0.0314      |
| 50    | 0.4     | 0.1419       | 0.1170      | 0.1465       | 0.1202      | 0.1820       | 0.1507      |
| LUMO  |         |              |             |              |             |              |             |
| 30    | 0.4     | 0.0867       | 0.0632      | 0.1520       | 0.0999      | 0.1104       | 0.0793      |
| 39    | 0.2     | 0.1388       | 0.1182      | 0.1757       | 0.1378      | 0.1771       | 0.1530      |
| 43    | 0.5     | 0.0685       | 0.0522      | 0.1268       | 0.0809      | 0.0975       | 0.0726      |

97

98 **Table S4.** Parameter tuning of PorphyDMPNN and its performance on training, validation and  
 99 test sets

| Epoch | Dropout | Train  |        | Validation |        | Test   |        |
|-------|---------|--------|--------|------------|--------|--------|--------|
|       |         | RMSE   | MAE    | RMSE       | MAE    | RMSE   | MAE    |
|       |         | (eV)   | (eV)   | (eV)       | (eV)   | (eV)   | (eV)   |
| E_gap |         |        |        |            |        |        |        |
| 100   | 0.4     | 0.0709 | 0.0498 | 0.0947     | 0.0682 | 0.0690 | 0.0527 |
| 110   | 0.4     | 0.0638 | 0.0425 | 0.0872     | 0.0598 | 0.0564 | 0.0427 |
| 150   | 0.4     | 0.0535 | 0.0326 | 0.0811     | 0.0467 | 0.0417 | 0.0315 |
| HOMO  |         |        |        |            |        |        |        |
| 15    | 0.4     | 0.0648 | 0.0479 | 0.0972     | 0.0702 | 0.0673 | 0.0494 |
| LUMO  |         |        |        |            |        |        |        |
| 30    | 0.4     | 0.1419 | 0.1063 | 0.1388     | 0.1048 | 0.1693 | 0.1334 |
| 40    | 0.4     | 0.1365 | 0.1030 | 0.1234     | 0.0982 | 0.1320 | 0.0973 |
| 60    | 0.4     | 0.1149 | 0.0860 | 0.1179     | 0.0913 | 0.1132 | 0.0864 |

100

101

102

103

104

105

106

**Table S5.** The learning curves of PorphyBERT on HOMO, LUMO and E<sub>gap</sub>

| Type             | Epoch | Learning Curve                                                                       |
|------------------|-------|--------------------------------------------------------------------------------------|
| HOMO             | 40    | 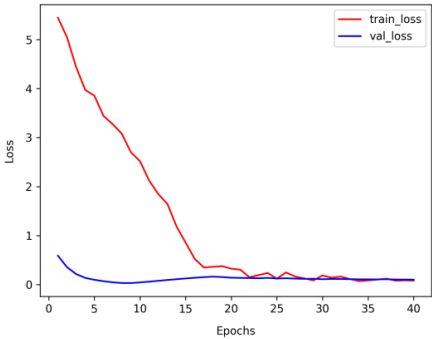   |
| LUMO             | 40    |   |
| E <sub>gap</sub> | 50    |  |

111

112

**Table S6.** The learning curves of PorphyDMPNN on HOMO, LUMO and E<sub>gap</sub>

| Type             | Epoch | Learning Curve                                                                       |
|------------------|-------|--------------------------------------------------------------------------------------|
| HOMO             | 20    | 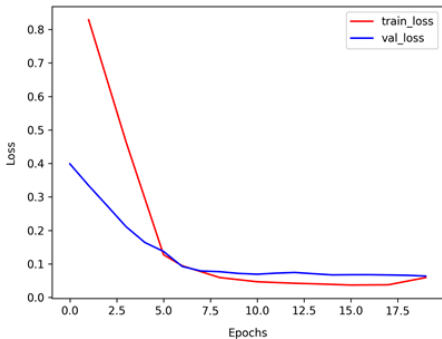   |
| LUMO             | 70    |   |
| E <sub>gap</sub> | 120   |  |

113

114

#### 115 **4. PorphyDMPNN fine-tuned with the feature-based approach**

116 This section shows the performance of PorphyDMPNN fine-tuned using the  
117 feature-based approach rather than the fine-tuning approach shown in the main text. The  
118 performance on the training and validation sets is shown in Table S7 and performance on  
119 the test set is shown in Figure S9.

120

121 **Table S7.** The prediction performance of PorphyDMPNN fined by tge feature-based approach on  
122 training and validation sets

| Energy type | Train  |        | Validation |        |
|-------------|--------|--------|------------|--------|
|             | RMSE   | MAE    | RMSE       | MAE    |
|             | (eV)   | (eV)   | (eV)       | (eV)   |
| HOMO        | 0.0511 | 0.0381 | 0.0728     | 0.0517 |
| LUMO        | 0.1500 | 0.1167 | 0.1730     | 0.1423 |
| E_gap       | 0.1655 | 0.1329 | 0.1607     | 0.1288 |

123

124

125

126

127

128

129

130

131

132

133

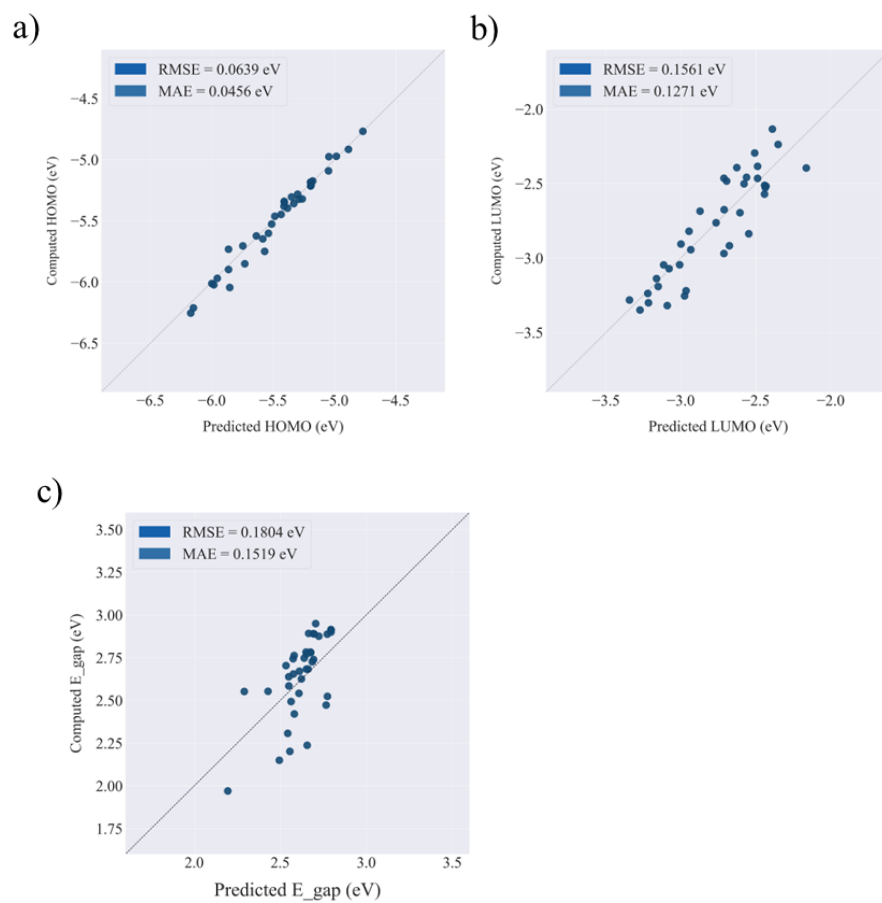

134

135 **Figure S9.** Performance of PorphyDMPNN fine-tuned with the feature-based approach in  
 136 predicting HOMO, LUMO levels and E\_gap. a) HOMO level, b) LUMO level, c) Energy gap  
 137 (E\_gap).

138

139

140

141

142

143

144 **5. Performance of baseline models trained with PBDD or MpPD only**

145 A BERT model was trained only with PBDD or MpPD to directly predict its HOMO and  
 146 LUMO energy levels and E<sub>gap</sub>. The performance of the model is shown in Table S8  
 147 (training set and validation set) and Figure S10 (test set).

148

149

150 **Table S8.** Performance of BERT model trained only on PBDD or MpPD in predicting HOMO,  
 151 LUMO level and E<sub>gap</sub> (training and validation)

| Training datasets | Train    |         | Validation |         |
|-------------------|----------|---------|------------|---------|
|                   | RMSE(eV) | MAE(eV) | RMSE(eV)   | MAE(eV) |
| HOMO              |          |         |            |         |
| Pure PBDD         | 0.0394   | 0.0291  | 0.0550     | 0.0409  |
| Pure MpPD         | 0.0858   | 0.0649  | 0.1011     | 0.0789  |
| LUMO              |          |         |            |         |
| Pure PBDD         | 0.0667   | 0.0558  | 0.0708     | 0.0599  |
| Pure MpPD         | 0.0824   | 0.0610  | 0.1476     | 0.1025  |
| E <sub>gap</sub>  |          |         |            |         |
| Pure PBDD         | 0.0887   | 0.0743  | 0.1278     | 0.1105  |
| Pure MpPD         | 0.0551   | 0.0355  | 0.0714     | 0.0561  |

152



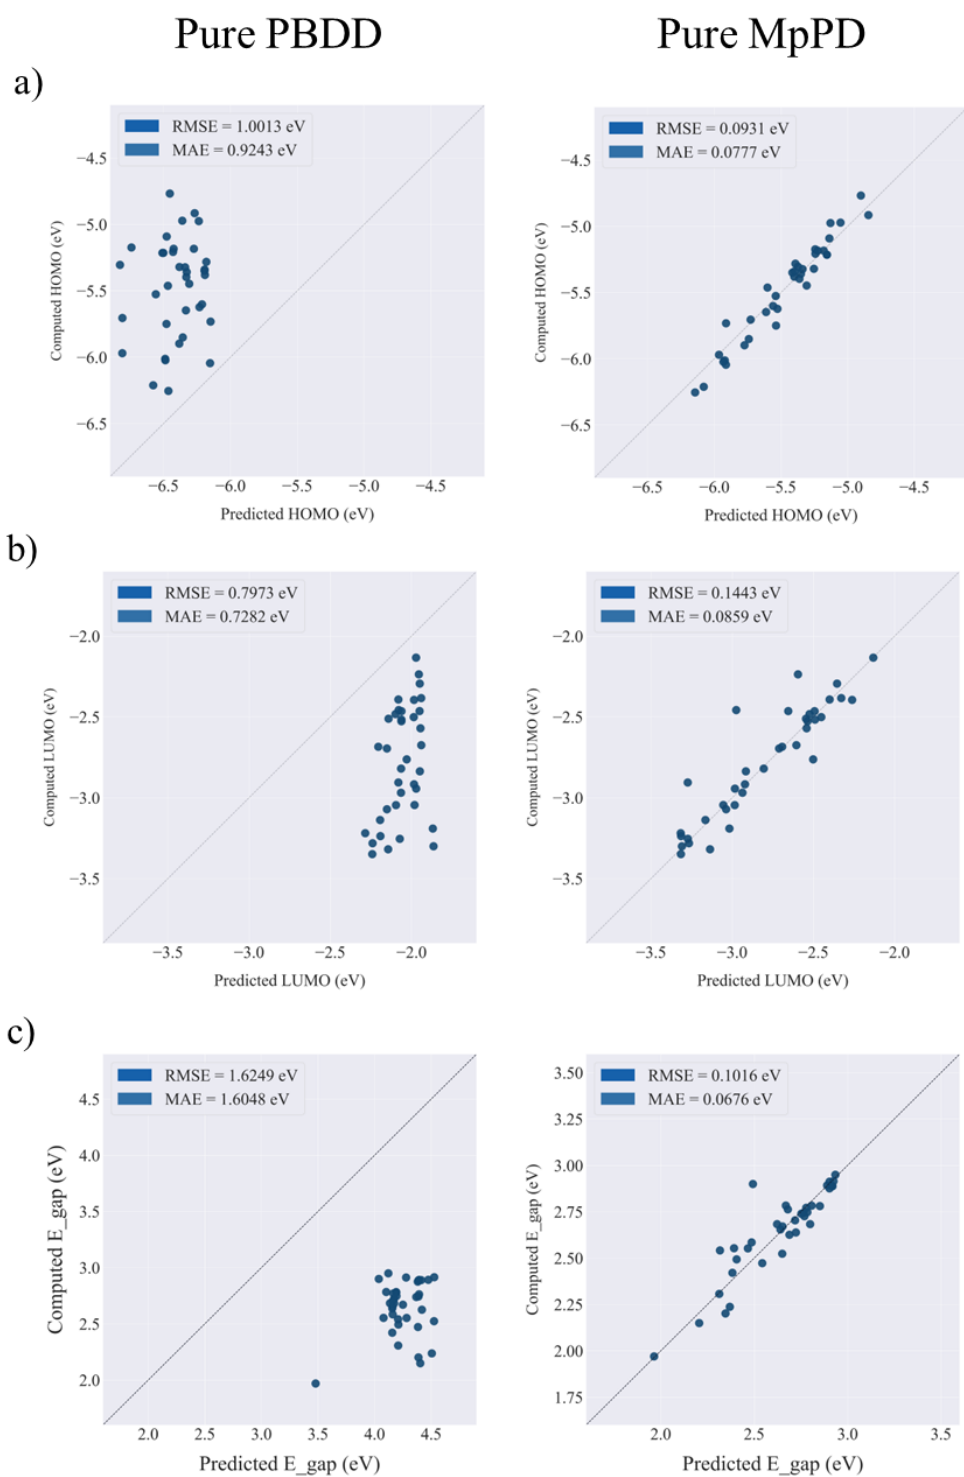

153

154 **Figure S10.** BERT model trained only on PBDD (left) or MpPD (right) in predicting a) HOMO  
 155 energy, b) LUMO energy, and c) energy gap ( $E_{\text{gap}}$ ).

156

157 Similarly, a DMPNN model was trained only on PBDD or MpPD and directly predict its  
158 HOMO and LUMO energy levels and E\_gap. The performance of the model is shown in  
159 Table S9 (training set and validation set) and Figure S11 (test set).

160

161 **Table S9.** Performance of DMPNN model trained only on PBDD or MpPD in predicting  
162 HOMO, LUMO level and E\_gap

| Training datasets | Train     |          | Validation |          |
|-------------------|-----------|----------|------------|----------|
|                   | RMSE (eV) | MAE (eV) | RMSE (eV)  | MAE (eV) |
| HOMO              |           |          |            |          |
| Pure PBDD         | 0.0468    | 0.0355   | 0.0491     | 0.0370   |
| Pure MpPD         | 0.0307    | 0.0200   | 0.0401     | 0.0254   |
| LUMO              |           |          |            |          |
| Pure PBDD         | 0.0627    | 0.0537   | 0.0609     | 0.0532   |
| Pure MpPD         | 0.0627    | 0.0457   | 0.0968     | 0.0592   |
| E_gap             |           |          |            |          |
| Pure PBDD         | 0.0966    | 0.0833   | 0.1002     | 0.0874   |
| Pure MpPD         | 0.0756    | 0.0462   | 0.0667     | 0.0490   |

163

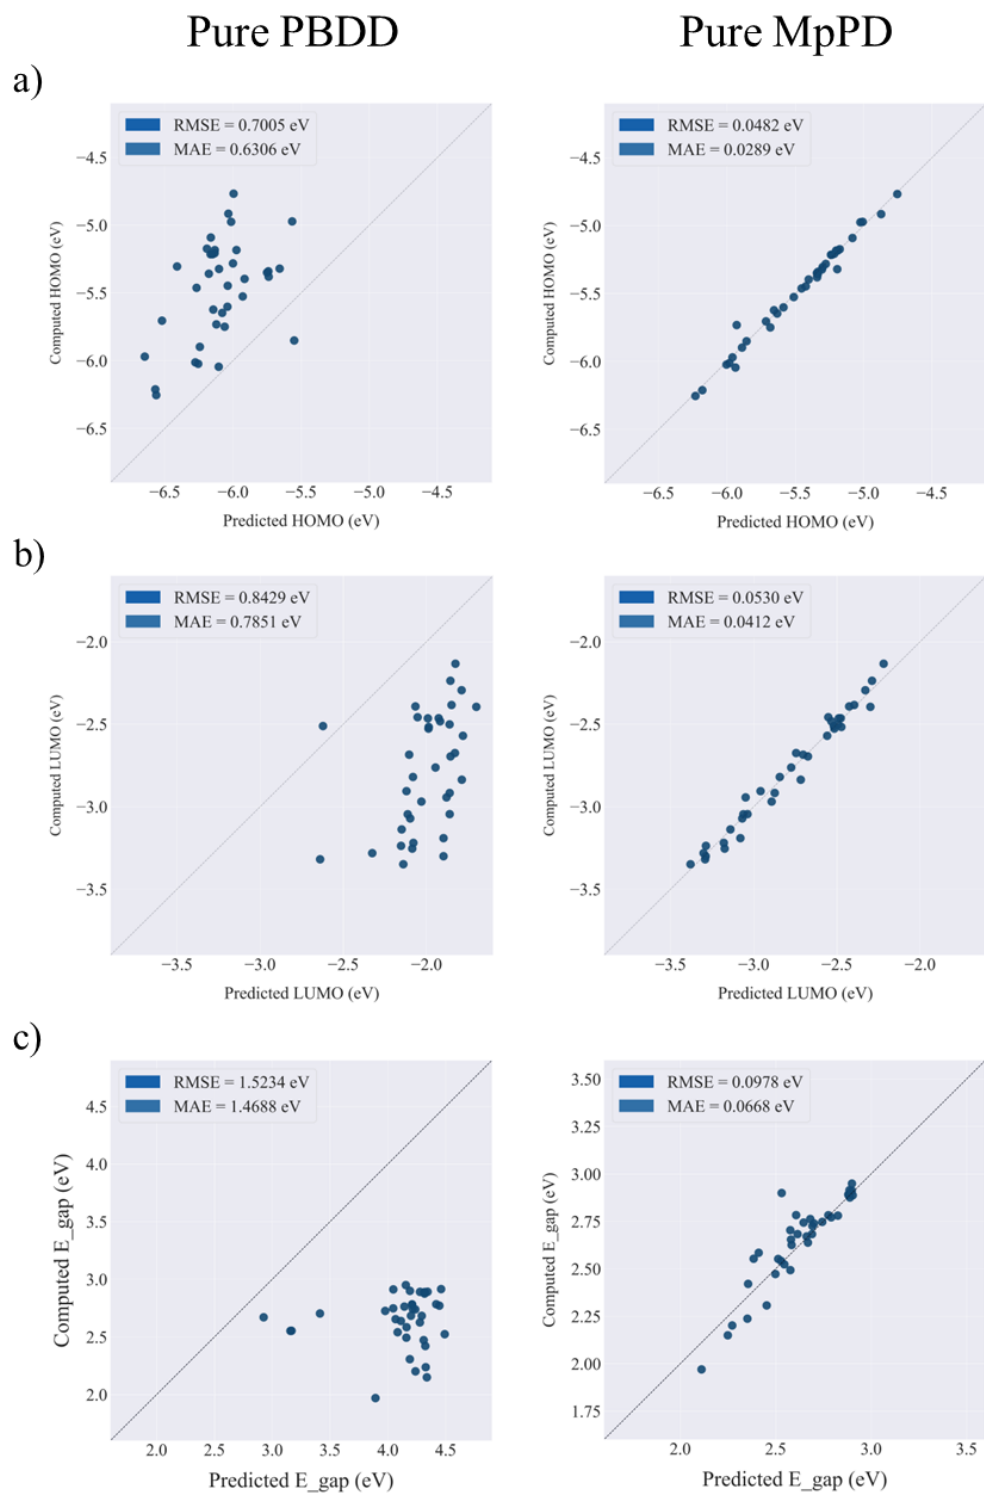

164

165

166

**Figure S11.** Performance of DMPNN model trained only on PBDD (left) or MpPD (right) in predicting a) HOMO energy, b) LUMO energy, and c) energy gap ( $E_{\text{gap}}$ ).

167

168 **6. Random Forest as benchmark model**

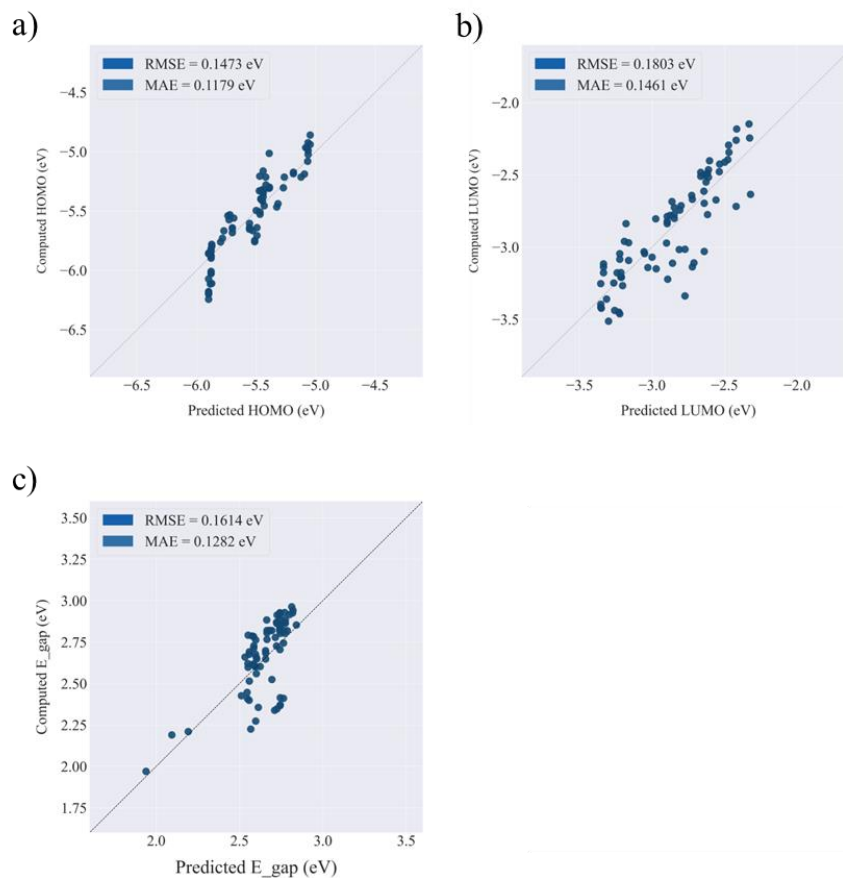

169

170 **Figure S12.** Performance of Random Forest model trained on MpPD in predicting a) HOMO  
171 energy, b) LUMO energy, and c) energy gap (E<sub>gap</sub>).

172

173

174

175

176

177 **References**

- 178 1. Shen, H.-M.; Hu, M.-Y.; Liu, L.; Qi, B.; Ye, H.-L.; She, Y.-B., Efficient and  
179 selective oxidation of tertiary benzylic C-H bonds with O<sub>2</sub> catalyzed by  
180 metalloporphyrins under mild and solvent-free conditions. *Applied Catalysis A: General*  
181 **2020**, 599.
- 182 2. Chang, I. J.; Jeon, Y. S.; Hwang, K. J., Synthesis and Band Gap Analysis of  
183 Designed Porphyrin Derivatives Containing Electron Donating and Accepting Group.  
184 *Bulletin of the Korean Chemical Society* **2019**, 40 (2), 173-179.
- 185 3. Porphyrin based dyes[DB/OL]. <https://cmr.fysik.dtu.dk/dssc/dssc.html>.
